# Supplementary material for: Racing Demands of Off-Road Triathlon: A Case Study of a National Champion Masters Triathlete
Source: MDPI journal article supplement (doi:10.3390/sports9100136), 2021-09-30
Supplement: s1 [file s1]

**Table S1.** Training summary data for a make masters off-road triathlete. Total training hours are broken down into relative sport training. Percent time in HR zones is for cycling and running combined; no HR was recorded during swimming. Approximately 20% of cycling took place mountain biking.

|                            | 2015  | 2016  | 2017  | 2018  | 2019  |
|----------------------------|-------|-------|-------|-------|-------|
| Total Training (hrs)       | 470.5 | 461.3 | 482.6 | 467.0 | 456.7 |
| <b>Training Discipline</b> |       |       |       |       |       |
| Swim                       | 17.0% | 18.1% | 13.9% | 12.4% | 13.7% |
| Bike                       | 50.4% | 48.1% | 53.6% | 52.6% | 49.2% |
| Run                        | 28.4% | 29.3% | 28.8% | 30.8% | 31.5% |
| Strength Training          | 4.3%  | 4.4%  | 3.6%  | 4.2%  | 5.6%  |
| <b>Heart Rate Zones</b>    |       |       |       |       |       |
| Zone 1                     | 70.3% | 72.8% | 77.1% | 73.5% | 76.6% |
| Zone 2                     | 24.4% | 22.3% | 19.3% | 22.4% | 19.6% |
| Zone 3                     | 5.3%  | 4.9%  | 3.7%  | 4.1%  | 4.4%  |

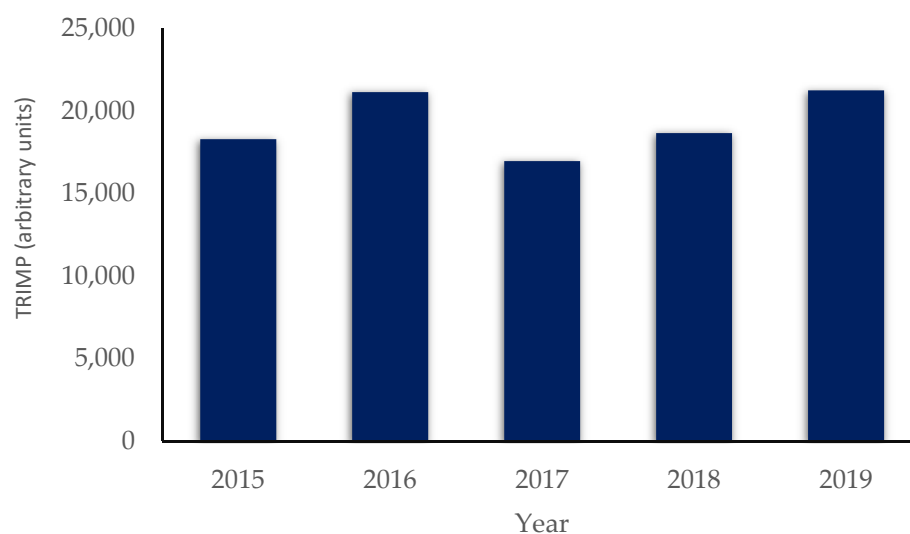

**Figure S1.** Graphical presentation of yearly HR TRIMP training load calculated based on a simplified 3-phase TRIMP score was calculated by multiplying the total duration in each HR zone by 1 for Zone 1, 2 for Zone 2, and 3 for Zone 3, then totaling the result.<sup>10</sup>

**Table S2.** Results reports for ordinary least squares regression analysis for cycling and running.

Events are significantly different, there does not appear to be differences between CXT and RXT; ROAD is quicker. CXT is significantly less work/min than the road, and not significantly different than the regional, even when adjusting for elevation gain and time, which significantly impact the kj/min work rate with elevation(+) and time(-).

|        |            |    |           |               |   |        |
|--------|------------|----|-----------|---------------|---|--------|
| Source | SS         | df | MS        | Number of obs | = | 22     |
|        |            |    |           | F (4, 17)     | = | 29.59  |
| Model  | 37.0515808 | 4  | 9.2628952 | Prob > F      | = | 0.0000 |

|                  |             | Coef.     | Std. Err. | t     | P> t  | [95% Conf. Interval] |          |
|------------------|-------------|-----------|-----------|-------|-------|----------------------|----------|
|                  | kj_min_bike |           |           |       |       |                      |          |
|                  | type_idx    |           |           |       |       |                      |          |
|                  | Road        | 2.154376  | .6682013  | 3.22  | 0.005 | .7445946             | 3.564157 |
|                  | RXT         | -.7531075 | .5460656  | -1.38 | 0.186 | -1.905205            | .3989903 |
|                  |             |           |           |       |       |                      |          |
| bike_m_elev_gain |             | .0031823  | .0015168  | 2.10  | 0.051 | -.000018             | .0063825 |
|                  | biketime    | -.0514029 | .0125508  | -4.10 | 0.001 | -.0778827            | -.024923 |
|                  | cons        | 14.47173  | 1.129722  | 12.81 | 0.000 | 12.08823             | 16.85524 |

| Source      | SS         | df | MS         | Number of obs | = | 22     |
|-------------|------------|----|------------|---------------|---|--------|
| -----+----- |            |    |            | F(3, 18)      | = | 8.70   |
| Model       | 3.7921042  | 3  | 1.26403473 | Prob > F      | = | 0.0009 |
| Residual    | 2.61553768 | 18 | .145307649 | R-squared     | = | 0.5918 |
| -----+----- |            |    |            | Adj R-squared | = | 0.5238 |
| Total       | 6.40764188 | 21 | .305125804 | Root MSE      | = | .38119 |

Time doesn't matter generally, but it's probably lack of data/collinearity.

| Source      | SS         | df | MS         | Number of obs | = | 22     |
|-------------|------------|----|------------|---------------|---|--------|
| -----+----- |            |    |            | F(4, 17)      | = | 6.71   |
| Model       | 3.92351246 | 4  | .980878115 | Prob > F      | = | 0.0020 |
| Residual    | 2.48412942 | 17 | .14612526  | R-squared     | = | 0.6123 |

```
-----+-----
Total | 6.40764188      21 .305125804  Adj R-squared = 0.5211
Root MSE = .38226
```

```
-----+-----
sp_run_min~m |      Coef.   Std. Err.      t    P>|t|     [95% Conf. Interval]
-----+-----
type_idx |
Road | -.387518   .3964067    -0.98   0.342   -1.223863   .448827
RXT | .0023654   .3459324     0.01   0.995   -.7274882   .7322191
|
run_m_gained | .0017286   .0012654     1.37   0.190   -.0009411   .0043982
total_time | .0047316   .0049895     0.95   0.356   -.0057953   .0152585
_cons | 3.90065    .8615682     4.53   0.000    2.0829     5.7184
-----+-----
```

```
. reg sp_run_min_km d_road run_m_gained time_run
```

```
Source |      SS      df      MS      Number of obs =      22
-----+-----
Model | 3.77207035      3 1.25735678      F(3, 18) =      8.59
Residual | 2.63557153     18 .14642064      Prob > F =      0.0009
-----+-----
Adj R-squared =      0.5201
Total | 6.40764188     21 .305125804      Root MSE =      .38265
```

```
-----+-----
sp_run_min~m |      Coef.   Std. Err.      t    P>|t|     [95% Conf. Interval]
-----+-----
d_road | -.3298868   .2320773    -1.42   0.172   -.817463   .1576895
run_m_gained | .0020706   .0013089     1.58   0.131   -.0006794   .0048205
time_run | .0128292   .0136005     0.94   0.358   -.0157443   .0414027
_cons | 3.992165    .4719277     8.46   0.000    3.000682   4.983648
-----+-----
```

```
. reg sp_run_min_km d_road time_run
```

```
Source |      SS      df      MS      Number of obs =      22
-----+-----
Model | 3.40568127      2 1.70284064      F(2, 19) =     10.78
Residual | 3.00196061     19 .157997927      Prob > F =      0.0007
-----+-----
Adj R-squared =      0.4822
Total | 6.40764188     21 .305125804      Root MSE =      .39749
```

| sp_run_min~m | Coef.    | Std. Err. | t     | P> t  | [95% Conf. Interval] |          |
|--------------|----------|-----------|-------|-------|----------------------|----------|
| d_road       | -.324477 | .2410516  | -1.35 | 0.194 | -.8290038            | .1800498 |
| time_run     | .0286576 | .0095686  | 2.99  | 0.007 | .0086302             | .048685  |
| _cons        | 3.643277 | .4333994  | 8.41  | 0.000 | 2.736162             | 4.550392 |

```
. reg sp_run_min_km d_road total_time
```

| Source   | SS         | df | MS         | Number of obs | = | 22     |
|----------|------------|----|------------|---------------|---|--------|
|          |            |    |            | F(2, 19)      | = | 12.57  |
| Model    | 3.6495262  | 2  | 1.8247631  | Prob > F      | = | 0.0003 |
| Residual | 2.75811568 | 19 | .145163983 | R-squared     | = | 0.5696 |
|          |            |    |            | Adj R-squared | = | 0.5242 |
| Total    | 6.40764188 | 21 | .305125804 | Root MSE      | = | .381   |

| sp_run_min~m | Coef.     | Std. Err. | t     | P> t  | [95% Conf. Interval] |           |
|--------------|-----------|-----------|-------|-------|----------------------|-----------|
| d_road       | -.4604397 | .2081883  | -2.21 | 0.039 | -.8961828            | -.0246965 |
| total_time   | .0080151  | .0023694  | 3.38  | 0.003 | .0030558             | .0129744  |
| _cons        | 3.698715  | .3694625  | 10.01 | 0.000 | 2.925421             | 4.472009  |

**Total kj on bike increases min/km, but probably collinear with total run time as longer is longer for both.**

```
. reg sp_run_min_km d_road energy_kj
```

| Source   | SS         | df | MS         | Number of obs | = | 22     |
|----------|------------|----|------------|---------------|---|--------|
|          |            |    |            | F(2, 19)      | = | 12.41  |
| Model    | 3.62939031 | 2  | 1.81469516 | Prob > F      | = | 0.0004 |
| Residual | 2.77825156 | 19 | .146223767 | R-squared     | = | 0.5664 |
|          |            |    |            | Adj R-squared | = | 0.5208 |
| Total    | 6.40764188 | 21 | .305125804 | Root MSE      | = | .38239 |

| sp_run_min~m | Coef.     | Std. Err. | t     | P> t  | [95% Conf. Interval] |           |
|--------------|-----------|-----------|-------|-------|----------------------|-----------|
| d_road       | -.6556956 | .195411   | -3.36 | 0.003 | -1.064696            | -.2466957 |
| energy_kj    | .0011956  | .0003569  | 3.35  | 0.003 | .0004486             | .0019426  |
| _cons        | 3.839424  | .3324154  | 11.55 | 0.000 | 3.143671             | 4.535177  |

The faster you run uphill the slower your overall run pace is on avg.

```
. reg sp_run_min_km d_road mtr_min_run
```

| Source   | SS         | df | MS         | Number of obs | = | 22     |
|----------|------------|----|------------|---------------|---|--------|
|          |            |    |            | F(2, 19)      | = | 10.05  |
| Model    | 3.29464206 | 2  | 1.64732103 | Prob > F      | = | 0.0011 |
| Residual | 3.11299982 | 19 | .163842096 | R-squared     | = | 0.5142 |
|          |            |    |            | Adj R-squared | = | 0.4630 |
| Total    | 6.40764188 | 21 | .305125804 | Root MSE      | = | .40477 |

| sp_run_min~m | Coef.     | Std. Err. | t     | P> t  | [95% Conf. Interval] |           |
|--------------|-----------|-----------|-------|-------|----------------------|-----------|
| d_road       | -.4873502 | .2214607  | -2.20 | 0.040 | -.9508727            | -.0238276 |
| mtr_min_run  | .140528   | .0497711  | 2.82  | 0.011 | .0363559             | .2447     |
| _cons        | 4.396699  | .2062267  | 21.32 | 0.000 | 3.965061             | 4.828336  |

```
. reg sp_run_min_km d_road time_run energy_kj
```

| Source   | SS         | df | MS         | Number of obs | = | 22     |
|----------|------------|----|------------|---------------|---|--------|
|          |            |    |            | F(3, 18)      | = | 7.97   |
| Model    | 3.65603407 | 3  | 1.21867802 | Prob > F      | = | 0.0014 |
| Residual | 2.75160781 | 18 | .152867101 | R-squared     | = | 0.5706 |
|          |            |    |            | Adj R-squared | = | 0.4990 |
| Total    | 6.40764188 | 21 | .305125804 | Root MSE      | = | .39098 |

| sp_run_min~m | Coef.     | Std. Err. | t     | P> t  | [95% Conf. Interval] |          |
|--------------|-----------|-----------|-------|-------|----------------------|----------|
| d_road       | -.5617226 | .3009772  | -1.87 | 0.078 | -1.194052            | .0706069 |
| time_run     | .0078448  | .0187905  | 0.42  | 0.681 | -.0316327            | .0473222 |
| energy_kj    | .0009323  | .0007285  | 1.28  | 0.217 | -.0005983            | .0024629 |
| _cons        | 3.72846   | .4314695  | 8.64  | 0.000 | 2.821976             | 4.634943 |

W' variability is strongly collinear with elevation -- pct W' doesn't make much difference. ie, Repeated sprint efforts do not seem to relate to subsequent running performance.

```
. reg energy_kj d_road w_prime_kj biketime bike_m_elev_gain
```

| Source   | SS         | df | MS         | Number of obs | = | 22     |
|----------|------------|----|------------|---------------|---|--------|
|          |            |    |            | F(4, 17)      | = | 180.75 |
| Model    | 1131638.98 | 4  | 282909.744 | Prob > F      | = | 0.0000 |
| Residual | 26607.796  | 17 | 1565.16447 | R-squared     | = | 0.9770 |
|          |            |    |            | Adj R-squared | = | 0.9716 |
| Total    | 1158246.77 | 21 | 55154.6082 | Root MSE      | = | 39.562 |

  

| energy_kj        | Coef.    | Std. Err. | t     | P> t  | [95% Conf. Interval] |          |
|------------------|----------|-----------|-------|-------|----------------------|----------|
| d_road           | 181.6988 | 43.56706  | 4.17  | 0.001 | 89.78033             | 273.6173 |
| w_prime_kj       | .1588444 | .5026958  | 0.32  | 0.756 | -.901751             | 1.21944  |
| biketime         | 8.526122 | .8127772  | 10.49 | 0.000 | 6.811312             | 10.24093 |
| bike_m_elev_gain | .1990108 | .1080118  | 1.84  | 0.083 | -.0288743            | .4268958 |
| _cons            | 95.59103 | 46.84167  | 2.04  | 0.057 | -3.236261            | 194.4183 |

```
. reg energy_kj d_road w_prime_kj biketime
```

| Source   | SS         | df | MS         | Number of obs | = | 22     |
|----------|------------|----|------------|---------------|---|--------|
|          |            |    |            | F(3, 18)      | = | 211.71 |
| Model    | 1126325.6  | 3  | 375441.867 | Prob > F      | = | 0.0000 |
| Residual | 31921.1713 | 18 | 1773.39841 | R-squared     | = | 0.9724 |
|          |            |    |            | Adj R-squared | = | 0.9678 |
| Total    | 1158246.77 | 21 | 55154.6082 | Root MSE      | = | 42.112 |

  

| energy_kj  | Coef.    | Std. Err. | t     | P> t  | [95% Conf. Interval] |          |
|------------|----------|-----------|-------|-------|----------------------|----------|
| d_road     | 157.1305 | 44.14926  | 3.56  | 0.002 | 64.37631             | 249.8846 |
| w_prime_kj | .290721  | .5296403  | 0.55  | 0.590 | -.822012             | 1.403454 |
| biketime   | 9.488405 | .6629001  | 14.31 | 0.000 | 8.095704             | 10.88111 |
| _cons      | 81.83176 | 49.22266  | 1.66  | 0.114 | -21.58121            | 185.2447 |

```
. reg energy_kj d_road w_prime_kj
```

| Source   | SS         | df | MS         | Number of obs | = | 22     |
|----------|------------|----|------------|---------------|---|--------|
|          |            |    |            | F(2, 19)      | = | 18.34  |
| Model    | 762999.506 | 2  | 381499.753 | Prob > F      | = | 0.0000 |
| Residual | 395247.266 | 19 | 20802.4877 | R-squared     | = | 0.6588 |
|          |            |    |            | Adj R-squared | = | 0.6228 |
| Total    | 1158246.77 | 21 | 55154.6082 | Root MSE      | = | 144.23 |

| energy_kj  | Coef.     | Std. Err. | t     | P> t  | [95% Conf. Interval] |          |
|------------|-----------|-----------|-------|-------|----------------------|----------|
| d_road     | 532.2771  | 121.6812  | 4.37  | 0.000 | 277.5955             | 786.9587 |
| w_prime_kj | 6.420465  | 1.06736   | 6.02  | 0.000 | 4.186454             | 8.654475 |
| _cons      | -72.43468 | 164.4944  | -0.44 | 0.665 | -416.7254            | 271.8561 |

```
. corr energy_kj d_road w_prime_kj biketime bike_m_elev_gain
(obs=22)
```

|              | energy~j | d_road  | w_prim~j | biketime | bike~ain |
|--------------|----------|---------|----------|----------|----------|
| energy_kj    | 1.0000   |         |          |          |          |
| d_road       | -0.0943  | 1.0000  |          |          |          |
| w_prime_kj   | 0.5613   | -0.7977 | 1.0000   |          |          |
| biketime     | 0.9575   | -0.3302 | 0.7236   | 1.0000   |          |
| bike_m_e~ain | 0.7451   | -0.6133 | 0.8373   | 0.8354   | 1.0000   |

```
. reg sp_run_min_km run_m_gained energy_kj i.type_idx
```

| Source   | SS         | df | MS         | Number of obs | = | 22     |
|----------|------------|----|------------|---------------|---|--------|
|          |            |    |            | F(4, 17)      | = | 6.79   |
| Model    | 3.94123883 | 4  | .985309708 | Prob > F      | = | 0.0019 |
| Residual | 2.46640305 | 17 | .145082532 | R-squared     | = | 0.6151 |
|          |            |    |            | Adj R-squared | = | 0.5245 |
| Total    | 6.40764188 | 21 | .305125804 | Root MSE      | = | .3809  |

| sp_run_min~m | Coef.    | Std. Err. | t    | P> t  | [95% Conf. Interval] |          |
|--------------|----------|-----------|------|-------|----------------------|----------|
| run_m_gained | .0017803 | .0012145  | 1.47 | 0.161 | -.0007821            | .0043428 |
| energy_kj    | .0007175 | .0007077  | 1.01 | 0.325 | -.0007756            | .0022107 |

|          |  |           |          |       |       |                    |
|----------|--|-----------|----------|-------|-------|--------------------|
|          |  |           |          |       |       |                    |
| type_idx |  |           |          |       |       |                    |
| Road     |  | -.4920969 | .3310841 | -1.49 | 0.156 | -1.190623 .2064295 |
| RXT      |  | .0097676  | .3387196 | 0.03  | 0.977 | -.7048682 .7244034 |
|          |  |           |          |       |       |                    |
| _cons    |  | 3.959658  | .7593055 | 5.21  | 0.000 | 2.357664 5.561653  |

```
. reg run_pace run_m_gained
```

| Source      | SS         | df | MS         | Number of obs | = | 22     |
|-------------|------------|----|------------|---------------|---|--------|
| -----+----- |            |    |            |               |   |        |
|             |            |    |            | F(1, 20)      | = | 18.75  |
| Model       | 8.02958879 | 1  | 8.02958879 | Prob > F      | = | 0.0003 |
| Residual    | 8.56613643 | 20 | .428306821 | R-squared     | = | 0.4838 |
|             |            |    |            | Adj R-squared | = | 0.4580 |
|             |            |    |            | Root MSE      | = | .65445 |
| Total       | 16.5957252 | 21 | .790272629 |               |   |        |

| run_pace     | Coef.    | Std. Err. | t     | P> t  | [95% Conf. Interval] |          |
|--------------|----------|-----------|-------|-------|----------------------|----------|
| -----+-----  |          |           |       |       |                      |          |
| run_m_gained | .0059519 | .0013746  | 4.33  | 0.000 | .0030845             | .0088194 |
| cons         | 6.769432 | .2442611  | 27.71 | 0.000 | 6.259912             | 7.278951 |
| -----        |          |           |       |       |                      |          |

```
. reg run_pace time_run
```

| Source      | SS         | df | MS         | Number of obs | = | 22     |
|-------------|------------|----|------------|---------------|---|--------|
| -----+----- |            |    |            |               |   |        |
|             |            |    |            | F(1, 20)      | = | 18.97  |
| Model       | 8.07920445 | 1  | 8.07920445 | Prob > F      | = | 0.0003 |
| Residual    | 8.51652077 | 20 | .425826038 | R-squared     | = | 0.4868 |
|             |            |    |            | Adj R-squared | = | 0.4612 |
|             |            |    |            | Root MSE      | = | .65255 |
| Total       | 16.5957252 | 21 | .790272629 |               |   |        |

| run_pace    | Coef.    | Std. Err. | t    | P> t  | [95% Conf. Interval] |          |
|-------------|----------|-----------|------|-------|----------------------|----------|
| -----+----- |          |           |      |       |                      |          |
| time_run    | .0574018 | .0131782  | 4.36 | 0.000 | .0299125             | .0848912 |
| cons        | 5.281566 | .5584796  | 9.46 | 0.000 | 4.116598             | 6.446534 |
| -----       |          |           |      |       |                      |          |

```
. reg run_pace time_run run_m_gained
```

| Source | SS | df | MS | Number of obs | = | 22 |
|--------|----|----|----|---------------|---|----|
|--------|----|----|----|---------------|---|----|



```

-----+-----
Model | 9.00338531      2  4.50169266  F(2, 19)      =      11.27
Residual | 7.5923399      19  .399596837  Prob > F      =      0.0006
-----+-----
Total | 16.5957252     21  .790272629  R-squared     =      0.5425
Adj R-squared =      0.4944
Root MSE   =      .63214

```

```

-----+-----
run_pace |      Coef.   Std. Err.      t    P>|t|     [95% Conf. Interval]
-----+-----
time_run |   .0324514   .0207879     1.56   0.135    - .0110581   .0759609
run_m_gained | .0032881   .0021621     1.52   0.145    - .0012373   .0078135
_cons |   5.826042   .6487438     8.98   0.000     4.468206   7.183878
-----+-----

```

```
. reg run_pace time_run energy_kj
```

```

Source |      SS      df      MS  Number of obs  =      22
-----+-----
Model | 8.09001374      2  4.04500687  F(2, 19)      =      9.04
Residual | 8.50571147     19  .447669025  Prob > F      =      0.0017
-----+-----
Total | 16.5957252     21  .790272629  R-squared     =      0.4875
Adj R-squared =      0.4335
Root MSE   =      .66908

```

```

-----+-----
run_pace |      Coef.   Std. Err.      t    P>|t|     [95% Conf. Interval]
-----+-----
time_run |   .0548339   .0213464     2.57   0.019     .0101555   .0995124
energy_kj |   .0001526   .0009822     0.16   0.878    - .0019031   .0022083
_cons |   5.252247   .6029082     8.71   0.000     3.990346   6.514148
-----+-----

```

```
. reg run_pace time_run biketime
```

```

Source |      SS      df      MS  Number of obs  =      22
-----+-----
Model | 8.52937293      2  4.26468646  F(2, 19)      =     10.05
Residual | 8.06635229     19  .424544857  Prob > F      =      0.0011
-----+-----
Total | 16.5957252     21  .790272629  R-squared     =      0.5139
Adj R-squared =      0.4628
Root MSE   =      .65157

```

```

-----+-----
run_pace |      Coef.   Std. Err.      t    P>|t|     [95% Conf. Interval]
-----+-----

```

|             |  |          |          |      |       |                    |
|-------------|--|----------|----------|------|-------|--------------------|
| -----+----- |  |          |          |      |       |                    |
| time_run    |  | .0384365 | .0226353 | 1.70 | 0.106 | -.0089396 .0858126 |
| biketime    |  | .0100908 | .0097994 | 1.03 | 0.316 | -.0104196 .0306011 |
| _cons       |  | 5.286414 | .5576587 | 9.48 | 0.000 | 4.119221 6.453607  |
| -----       |  |          |          |      |       |                    |

```
. reg run_pace time_run i.type_idx
```

|             |  |            |    |            |               |   |        |
|-------------|--|------------|----|------------|---------------|---|--------|
| Source      |  | SS         | df | MS         | Number of obs | = | 22     |
| -----+----- |  |            |    |            |               |   |        |
|             |  |            |    |            | F(3, 18)      | = | 7.20   |
| Model       |  | 9.05093051 | 3  | 3.01697684 | Prob > F      | = | 0.0022 |
| Residual    |  | 7.54479471 | 18 | .419155262 | R-squared     | = | 0.5454 |
| -----+----- |  |            |    |            |               |   |        |
|             |  |            |    |            | Adj R-squared | = | 0.4696 |
| Total       |  | 16.5957252 | 21 | .790272629 | Root MSE      | = | .64742 |

|             |  |           |           |       |       |                      |
|-------------|--|-----------|-----------|-------|-------|----------------------|
| -----+----- |  |           |           |       |       |                      |
| run_pace    |  | Coef.     | Std. Err. | t     | P> t  | [95% Conf. Interval] |
| -----+----- |  |           |           |       |       |                      |
| time_run    |  | .0348155  | .0218066  | 1.60  | 0.128 | -.0109985 .0806296   |
|             |  |           |           |       |       |                      |
| type_idx    |  |           |           |       |       |                      |
| Road        |  | -.8976722 | .6409368  | -1.40 | 0.178 | -2.24423 .448886     |
| RXT         |  | -.3407455 | .4597451  | -0.74 | 0.468 | -1.306634 .6251431   |
|             |  |           |           |       |       |                      |
| _cons       |  | 6.582961  | 1.200486  | 5.48  | 0.000 | 4.060834 9.105088    |
